# Supplementary material for: Photophysical and charge transport properties of pyrazolines
Source: Royal Society of Chemistry journal article supplement (doi:10.1039/c5ra19520a), 2015-12-08
Supplement: c5ra19520a1.pdf [file c5ra19520a1.pdf]

*Supporting information*

## **Photophysical and Charge Transport Properties of Pyrazolines**

Joseph Ajantha,<sup>ab</sup> Elumalai Varathan,<sup>abc</sup> Vishal Bharati,<sup>bcd</sup> Venkatesan Subramanian,<sup>\*abc</sup>  
Shanmugam Easwaramoorthi,<sup>\*abc</sup> Suresh Chand<sup>bcd</sup>

<sup>a</sup>Chemical Laboratory, CSIR-Central Leather Research Institute, Adyar, Chennai – 600020,  
India. *E-mail:* [moorthi@clri.res.in](mailto:moorthi@clri.res.in). *Fax:* +91-44-24431630.

<sup>b</sup>CSIR-Network of Institutes for Solar Energy (NISE), CSIR-NPL, New Delhi, India.

<sup>c</sup>Physics of Energy Harvesting Division, National Physical Laboratory, K. S. Krishnan Marg,  
New-Delhi - 110012, India

<sup>d</sup>Academy of Scientific and Innovative Research (AcSIR)

## Spectral data of target compounds

### 3-(4-methoxystyryl)-4,5-dihydro-5-(4-methoxyphenyl)-1-phenyl-1H-pyrazole (1a)

Fluorescence yellowish green solid; mp: 148-150 °C; IR (KBr, cm<sup>-1</sup>): 3052, 2928, 1599, 1457, 1322, 1280, 1252, 1178, 1101, 1066, 956, 951, 775,676; <sup>1</sup>H NMR (CDCl<sub>3</sub>, 400 MHz): δ (ppm) 2.99-2.93 (m, 1H), 3.69-3.62 (m, 1H), 3.76 (s, 3H), 3.81 (s, 3H), 5.20-5.15 (m, 1H), 6.51-6.47 (d, *J* = 16 Hz, 1H), 6.77-6.74 (t, *J* = 6 Hz, 1H), 6.88-6.83 (t, *J* = 10 Hz, 4H), 7.01-6.99 (d, *J* = 8Hz, 2H), 7.10 (s, 1H), 7.16-7.15 (d, *J* = 4 Hz, 2H), 7.18-7.17 (d, *J* = 4 Hz, 1H), 7.25-7.20 (d, *J* = 20 Hz, 2H), 7.38-7.36 (d, *J* = 8 Hz, 2H); <sup>13</sup>C NMR (CDCl<sub>3</sub>, 100 MHz): δ (ppm) 42.4, 55.2, 55.3, 63.6, 113.3, 114.2, 119.1, 119.6, 126.9, 127.8, 128.9, 129.5, 132.3, 134.5, 144.3, 148.7, 158.9, 159.6; ESI-MS for C<sub>25</sub>H<sub>24</sub>N<sub>2</sub>O<sub>2</sub> Calculated M<sup>+</sup> (m/z) 384.47, found 385.13.

### 3-(4-(allyloxy) styryl)-5-(4-(allyloxy) phenyl)-4,5-dihydro-1-phenyl-1H-pyrazole (1b)

Fluorescence yellowish green solid; mp: 85-89 °C; IR (KBr, cm<sup>-1</sup>): 3020, 2918, 1597, 1405, 1329, 1243, 1176, 1117, 1056, 924, 863, 744, 694; <sup>1</sup>H NMR (CDCl<sub>3</sub>, 400 MHz): δ (ppm) 3.00-2.94 (m, 1H), 3.70-3.62 (m, 1H), 4.50-4.49 (d, *J* = 4 Hz, 2H), 4.55-4.54 (d, *J* = 4 Hz, 2H), 5.20-5.16 (m, 1H), 5.31-5.28 (d, *J* = 12 Hz, 2H), 5.41-5.39 (d, *J* = 8 Hz, 2H), 6.10-5.98 (m, 2H), 6.78-6.74 (t, *J* = 8 Hz, 1H), 6.92-6.84 (m, 5H), 7.00-6.98 (d, *J* = 8 Hz, 2H) 7.06 (s, 1H), 7.16-7.14 (d, *J* = 8 Hz, 2H), 7.20-7.18 (d, *J* = 8 Hz, 2H), 7.37-7.35 (t, *J* = 4 Hz, 2H), 7.46-7.44 (d, *J* = 8 Hz, 1H); <sup>13</sup>C NMR (CDCl<sub>3</sub>, 100 MHz): δ (ppm) 42.4, 63.6, 68.8, 113.3, 115.1, 115.2, 117.7, 117.8, 119.0, 119.7, 126.9,127.8, 128.9, 129.6, 132.2, 133.0, 133.2, 134.7, 144.3, 148.7, 158.0, 158.6; ESI-MS for C<sub>29</sub>H<sub>28</sub>N<sub>2</sub>O<sub>2</sub> Calculated M<sup>+</sup> (m/z) 436.54, found 437.22.

### 3-(3,4-dimethoxystyryl)-4,5-dihydro-5-(3,4-dimethoxyphenyl)-1-phenyl-1H-pyrazole (1c)

Fluorescence yellowish green solid; mp: 139-141 °C; IR (KBr, cm<sup>-1</sup>): 3429, 2994, 1654, 1592, 1548, 1477, 1354, 1283, 1154, 1205, 1069, 951, 873, 747, 692; <sup>1</sup>H NMR (CDCl<sub>3</sub>, 400 MHz): δ (ppm) 3.03-2.97 (m, 1H), 3.79 (s, 3H), 3.86 (s, 3H), 3.89 (s, 3H), 3.97 (s, 3H), 5.59-5.54 (m, 1H), 6.78-6.74 (d, *J* = 16 Hz, 2H), 6.85-6.81 (t, *J* = 8 Hz, 2H), 6.97-6.93 (t, *J* = 8 Hz, 1H), 7.02-6.99 (d, *J* = 12 Hz, 2H), 7.06-7.04 (d, *J* = 8 Hz, 1H), 7.17-7.15 (d, *J* = 8 Hz, 2H), 7.21-7.19 (d, *J* = 8 Hz, 2H), 7.25 (s, 2H); <sup>13</sup>C NMR (CDCl<sub>3</sub>, 100 MHz): δ (ppm) 41.4, 55.7, 58.7, 60.7, 61.1, 111.5, 111.7, 118.4, 119.1, 122.8, 124.1, 124.6, 126.5, 128.9, 130.8, 135.9,

144.2, 145.6, 146.8, 149.3, 152.8, 153.1; ESI-MS for C<sub>27</sub>H<sub>28</sub>N<sub>2</sub>O<sub>4</sub> Calculated M<sup>+</sup> (m/z) 444.52, found 445.27.

**3-(3,4,5-trimethoxystyryl)-4,5-dihydro-5-(3,4,5-trimethoxyphenyl)-1-phenyl-1H-pyrazole (1d)**

Fluorescence yellowish green solid; mp: 180-182 °C; IR (KBr, cm<sup>-1</sup>): 3427, 2926, 1595, 1501, 1459, 1421, 1331, 1238, 1127, 1056, 963, 875,746; <sup>1</sup>H NMR (CDCl<sub>3</sub>, 400 MHz): δ (ppm) 3.05-2.98 (m, 1H), 3.69-3.65 (m, 1H), 3.82-3.81 (d, *J* = 4 Hz, 9H), 3.88-3.86 (d, *J* = 8 Hz, 9H), 5.17-5.12 (m, 1H), 6.50-6.46 (t, *J* = 8 Hz, 3H), 6.68 (s, 2H), 6.83-6.79 (t, *J* = 8 Hz, 1H), 7.03-7.01 (d, *J* = 8 Hz, 2H), 7.22-7.18 (d, *J* = 16 Hz, 1H) 7.26 (s, 1H); <sup>13</sup>C NMR (CDCl<sub>3</sub>, 100 MHz): δ (ppm) 42.3, 56.0, 56.1, 60.8, 60.9, 64.7, 102.3, 103.6, 113.4, 119.5, 121.1, 128.9, 132.2, 132.7, 137.1, 138.2, 138.3, 144.4,148.5, 153.4, 153.8; ESI-MS for C<sub>29</sub>H<sub>32</sub>N<sub>2</sub>O<sub>6</sub> Calculated M<sup>+</sup> (m/z) 504.57, found 505.13.

**Table S1.** Photophysical properties of pyrazolines in different solvents

| <b>compound</b> | <b>Solvents</b> | <b>Absorbance<br/>(nm)</b> | <b>Fluorescence<br/>(nm)</b> | <b>Stokes Shift<br/>(cm<sup>-1</sup>)</b> |
|-----------------|-----------------|----------------------------|------------------------------|-------------------------------------------|
| <b>1a</b>       | Heptane         | 285, 382                   | 451                          | 4005                                      |
|                 | Dichloromethane | 286, 385                   | 471                          | 4743                                      |
|                 | Acetonitrile    | 276, 381                   | 472                          | 5060                                      |
|                 | Methanol        | 285, 380                   | 485                          | 5697                                      |
| <b>1b</b>       | Heptane         | 285, 383                   | 449                          | 3838                                      |
|                 | Dichloromethane | 286, 385                   | 470                          | 4697                                      |
|                 | Acetonitrile    | 285, 381                   | 474                          | 5150                                      |
|                 | Methanol        | 285, 379                   | 484                          | 5724                                      |
| <b>1c</b>       | Heptane         | 301, 381                   | 449                          | 4073                                      |
|                 | Dichloromethane | 305, 384                   | 477                          | 4900                                      |
|                 | Acetonitrile    | 304, 383                   | 480                          | 5276                                      |
|                 | Methanol        | 301, 382                   | 488                          | 5770                                      |
| <b>1d</b>       | Heptane         | 301, 381                   | 451                          | 3818                                      |
|                 | Dichloromethane | 305, 384                   | 473                          | 4278                                      |
|                 | Acetonitrile    | 304,383                    | 480                          | 3786                                      |
|                 | Methanol        | 301, 383                   | 490                          | 5770                                      |

**Table S2. Photophysical properties of pyrazolines in different solvents**

| <b>Compound</b> | <b>Wavelength (nm)</b> | <b>Osc. Strength</b> | <b>Major contributions</b>                                   |
|-----------------|------------------------|----------------------|--------------------------------------------------------------|
| <b>1a</b>       | 415                    | 0.916                | HOMO→LUMO (78%)                                              |
|                 | 308                    | 0.150                | H-2→LUMO (33%), H-1→LUMO (53%)                               |
|                 | 299                    | 0.194                | H-2→LUMO (23%), H-1→LUMO (20%), HOMO→L+3 (37%)               |
|                 | 254                    | 0.105                | HOMO→L+5 (48%), HOMO→L+6 (13%)                               |
|                 | 227                    | 0.105                | H-6→LUMO (13%), H-1→L+2 (53%)                                |
| <b>1b</b>       | 416                    | 0.937                | HOMO→LUMO (79%)                                              |
|                 | 305                    | 0.145                | H-1→LUMO (31%), HOMO→L+2 (32%), HOMO→L+3 (20%)               |
|                 | 302                    | 0.099                | HOMO→L+2 (57%), HOMO→L+3 (17%)                               |
|                 | 254                    | 0.116                | H-5→LUMO (11%), HOMO→L+7 (47%), HOMO→L+8 (14%)               |
|                 | 248                    | 0.078                | H-5→LUMO (41%), HOMO→L+7 (17%), HOMO→L+8 (18%)               |
| <b>1c</b>       | 415                    | 0.945                | HOMO→LUMO (79%)                                              |
|                 | 313                    | 0.135                | H-2→LUMO (16%), H-1→LUMO (63%)                               |
|                 | 297                    | 0.141                | H-3→LUMO (15%), H-1→LUMO (11%), HOMO→L+3 (59%)               |
|                 | 254                    | 0.115                | HOMO→L+5 (57%), HOMO→L+6 (13%)                               |
|                 | 224                    | 0.094                | H-2→L+2 (60%)                                                |
| <b>1d</b>       | 334                    | 0.102                | H-3→LUMO (55%)                                               |
|                 | 306                    | 0.075                | H-6→LUMO (44%)                                               |
|                 | 291                    | 0.143                | H-8→LUMO (12%), HOMO→L+1 (62%)                               |
|                 | 262                    | 0.105                | H-2→L+1 (21%), HOMO→L+2 (44%), HOMO→L+6 (11%)                |
|                 | 257                    | 0.142                | H-2→L+1 (14%), H-1→L+2 (13%), HOMO→L+2 (38%), HOMO→L+6 (12%) |

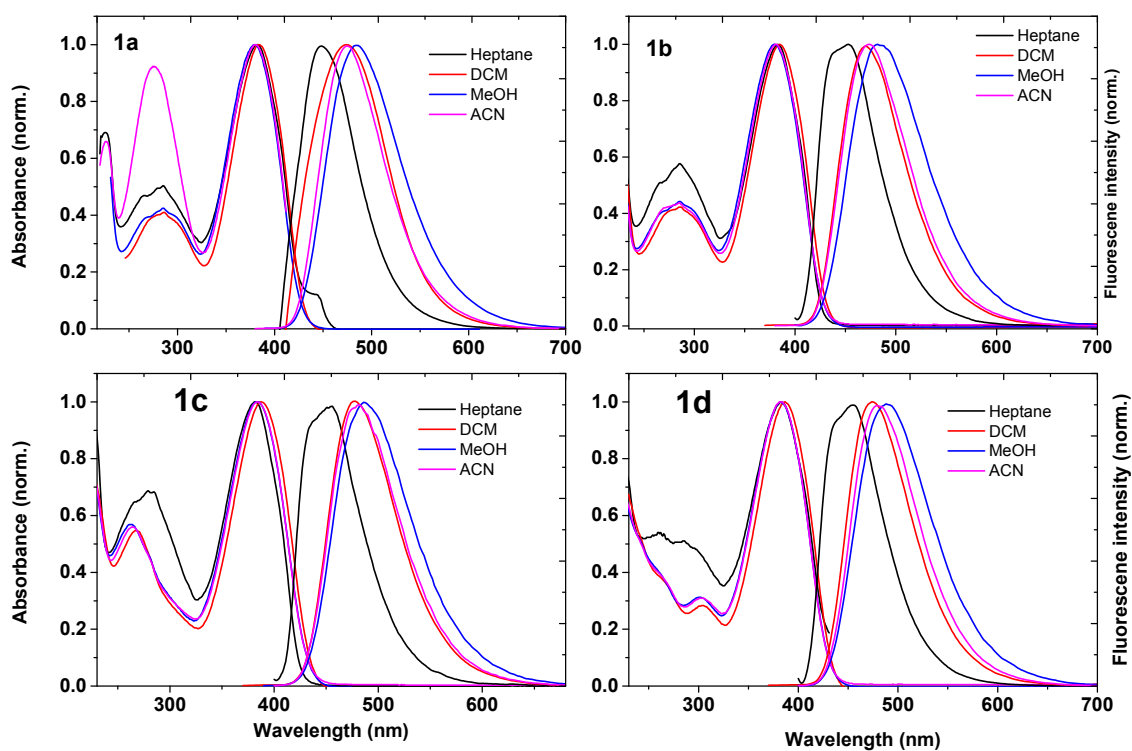

**Figure S1.** UV-visible absorption and fluorescence emission of pyrazolines derivatives **1a-d** in different solvents.

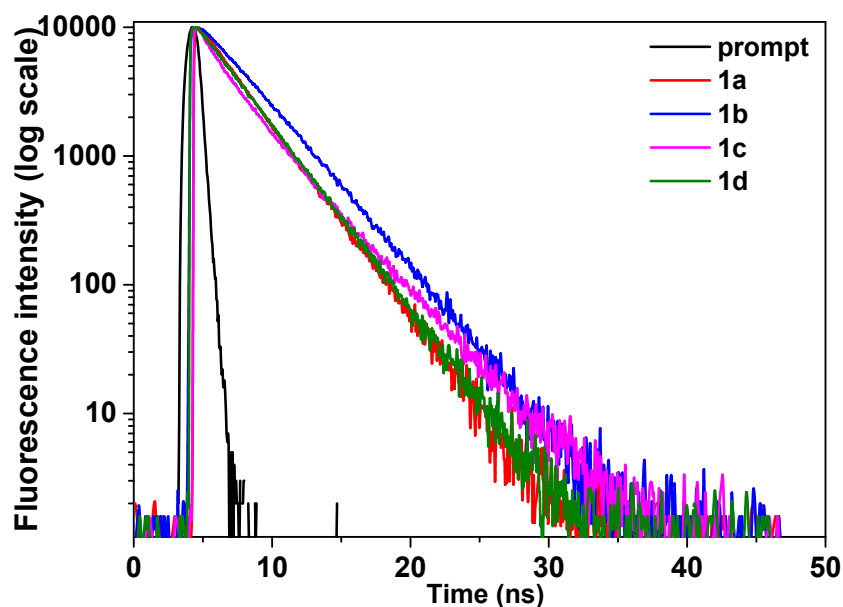

**Figure S2.** Fluorescence lifetime decay profiles of pyrazolines **1a-1d** dissolved in acetonitrile. The samples are excited at 375 nm and the decay profiles were monitored at respective emission aximum

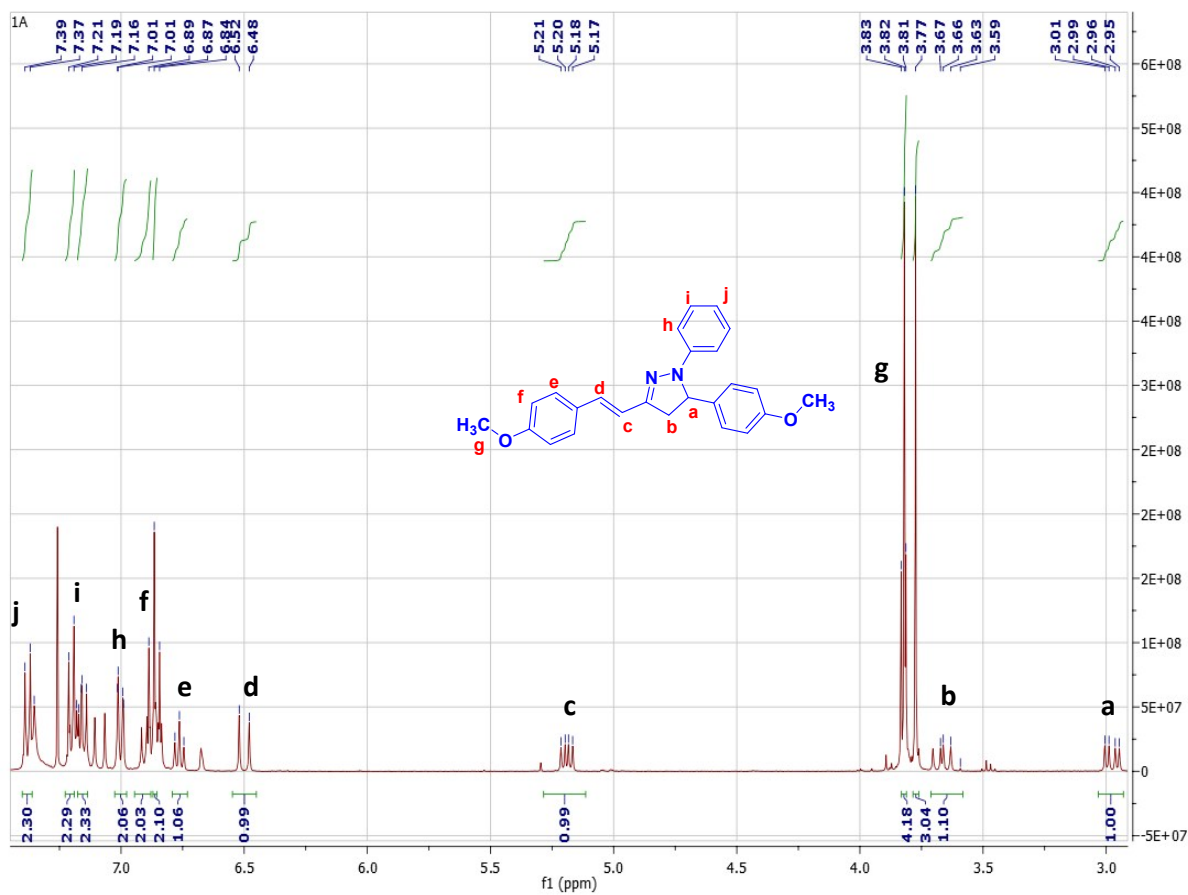

Fig. S3  $^1\text{H-NMR}$  spectrum of **1a** in  $\text{CDCl}_3$ .

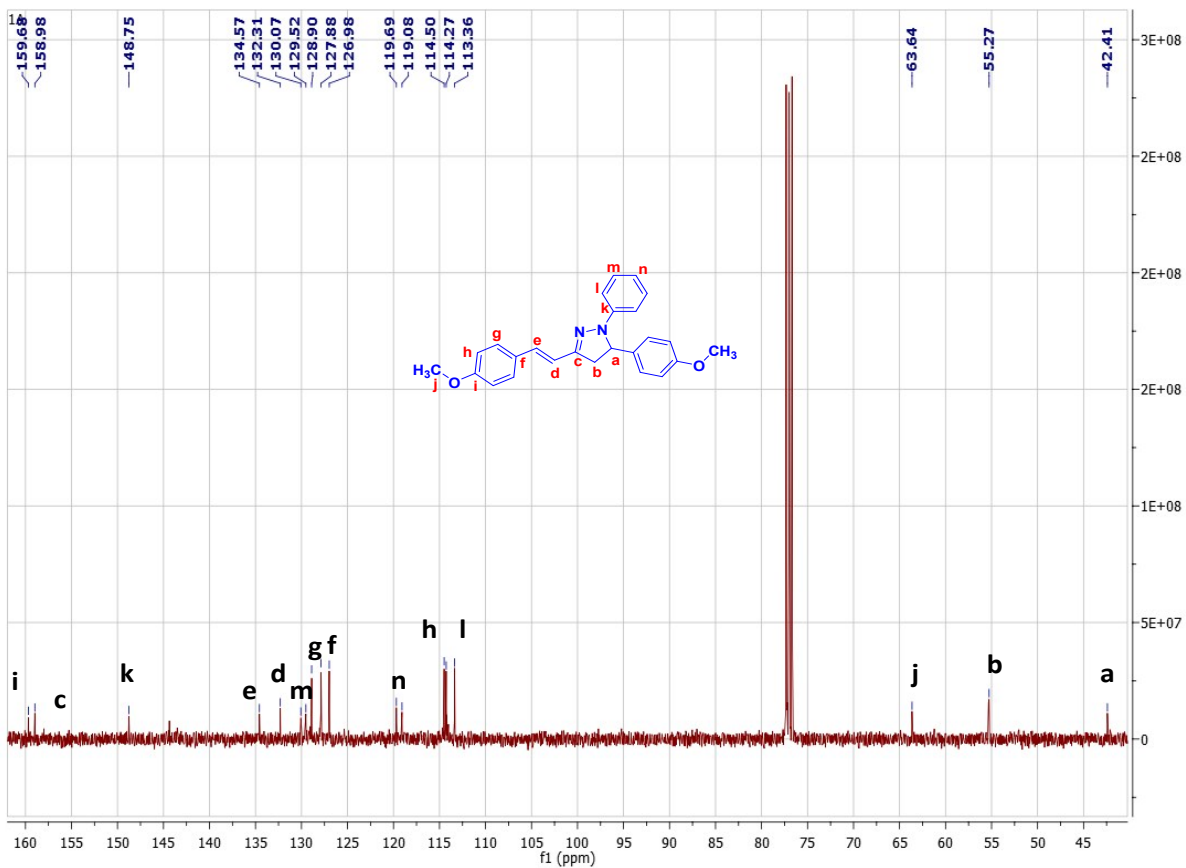

Fig.S4  $^{13}\text{C-NMR}$  spectrum of **1a** in  $\text{CDCl}_3$

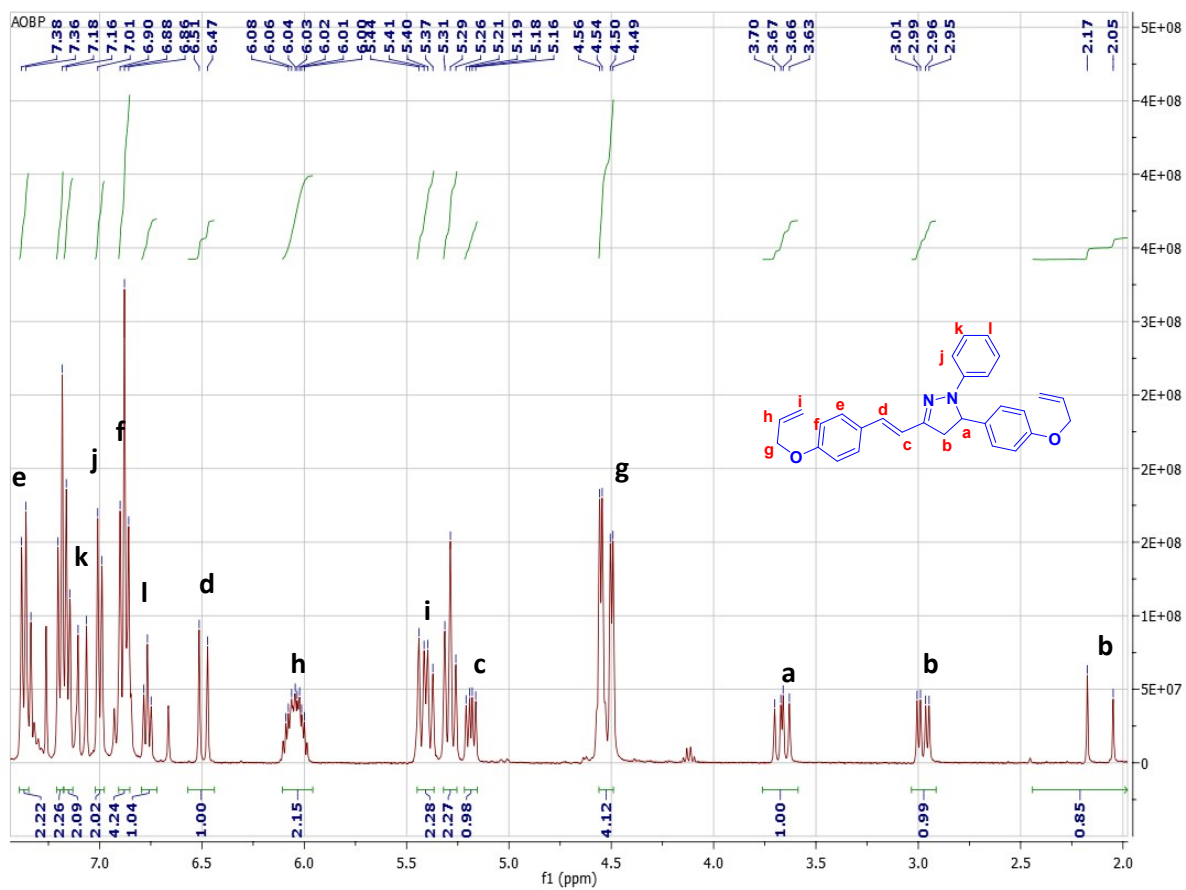

Fig. S5  $^1\text{H-NMR}$  spectrum of **1b** in  $\text{CDCl}_3$

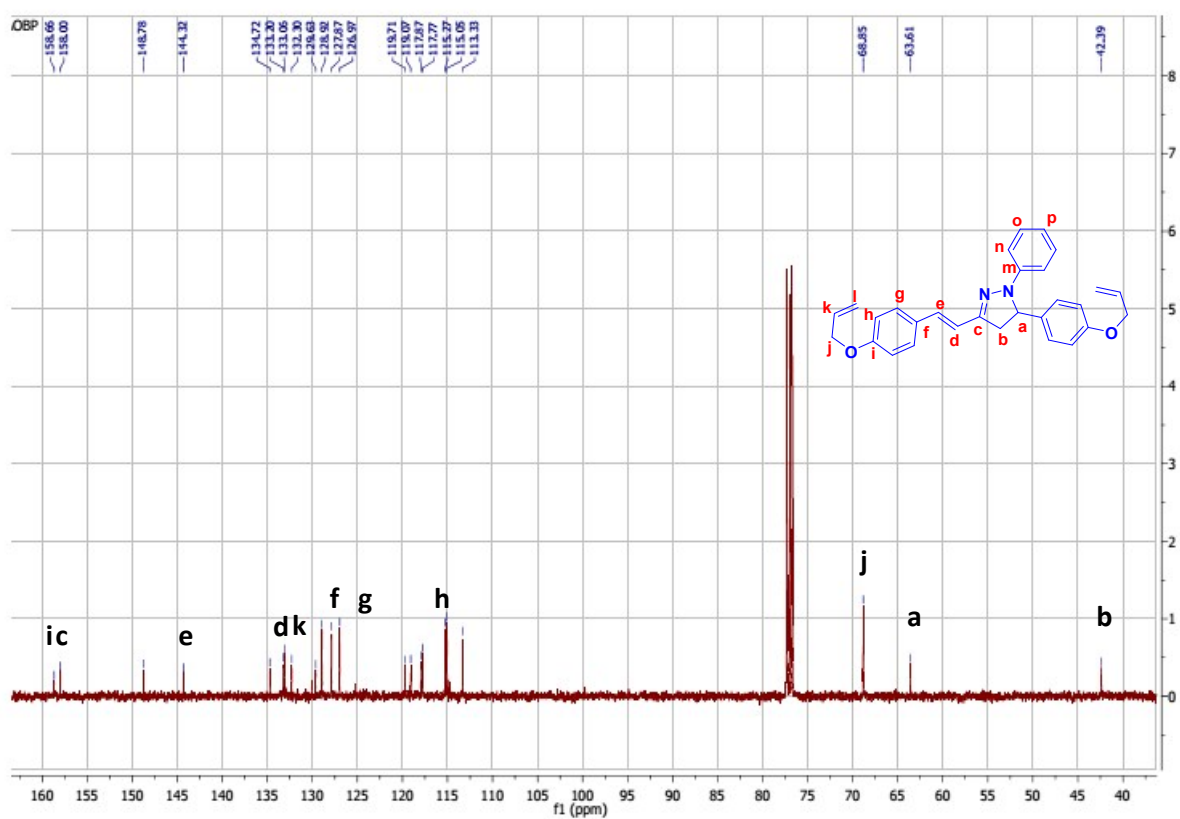

Fig. S6  $^{13}\text{C-NMR}$  spectrum of **1b** in  $\text{CDCl}_3$



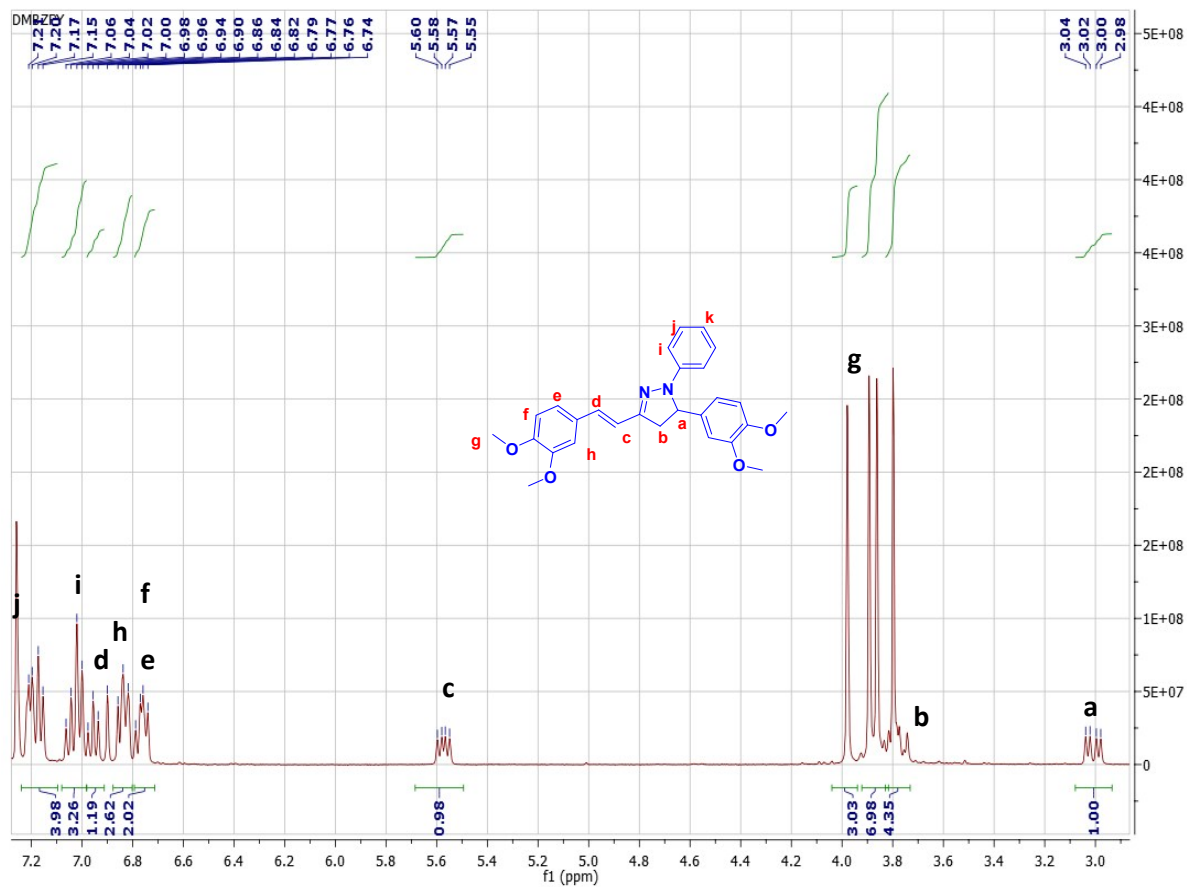

Fig. S7  $^1\text{H-NMR}$  spectrum of **1c** in  $\text{CDCl}_3$

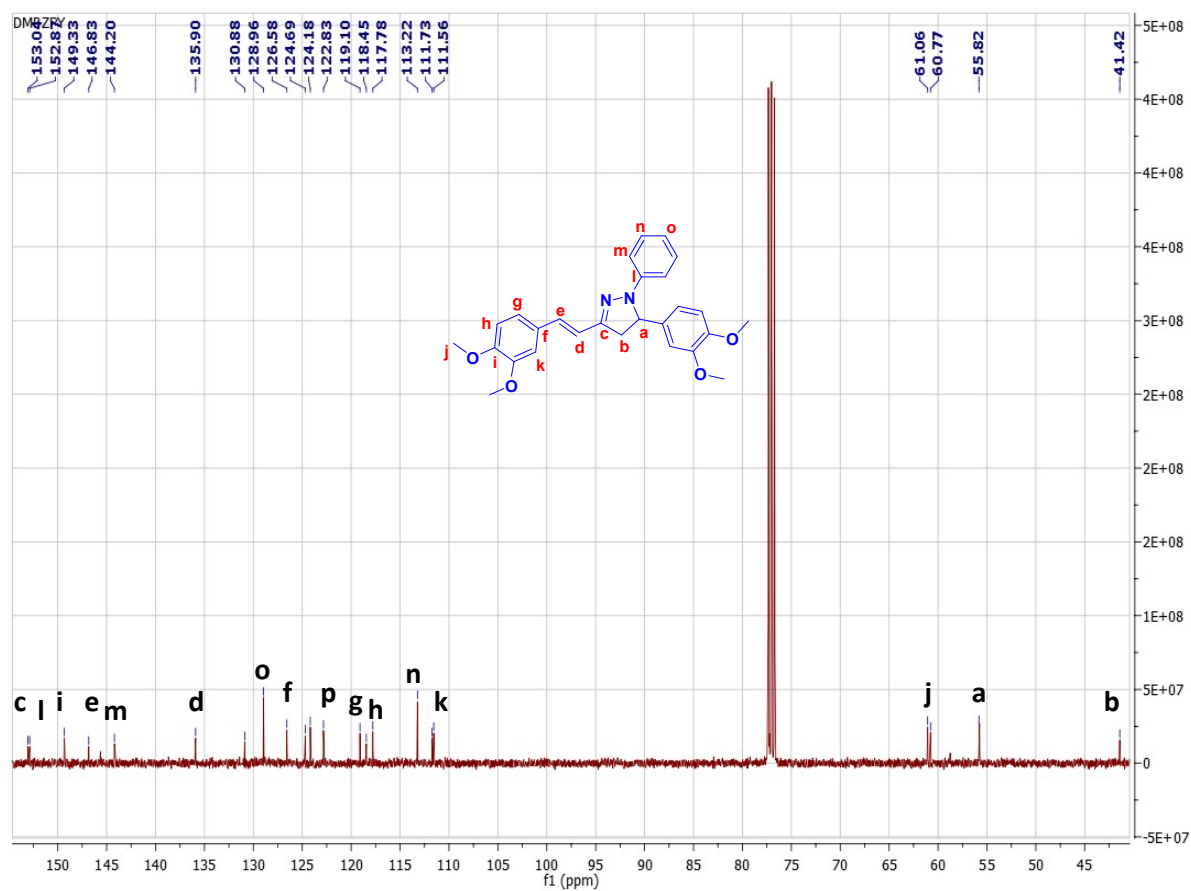

Fig. S8  $^{13}\text{C-NMR}$  spectrum of **1c** in  $\text{CDCl}_3$

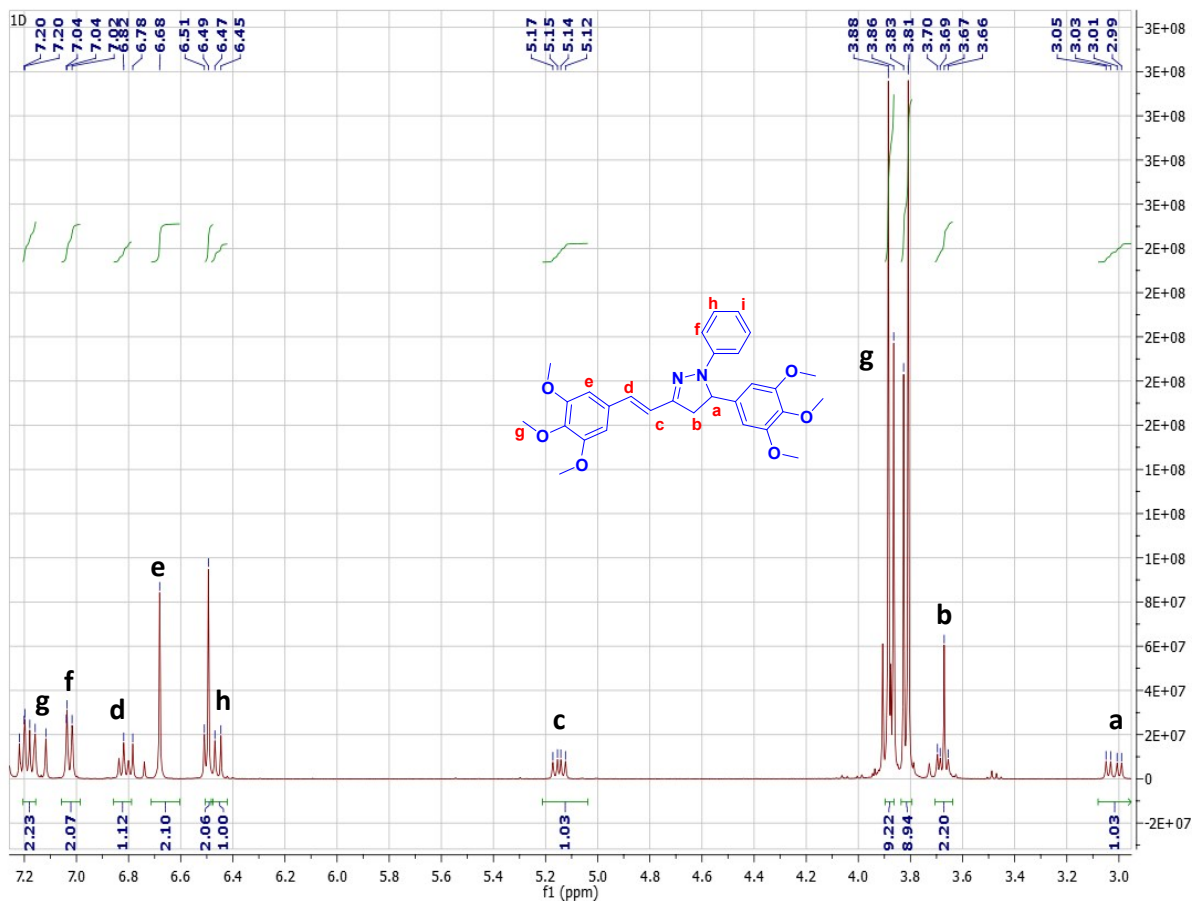

Fig. S9 <sup>1</sup>H-NMR spectrum of **1d** in CDCl<sub>3</sub>

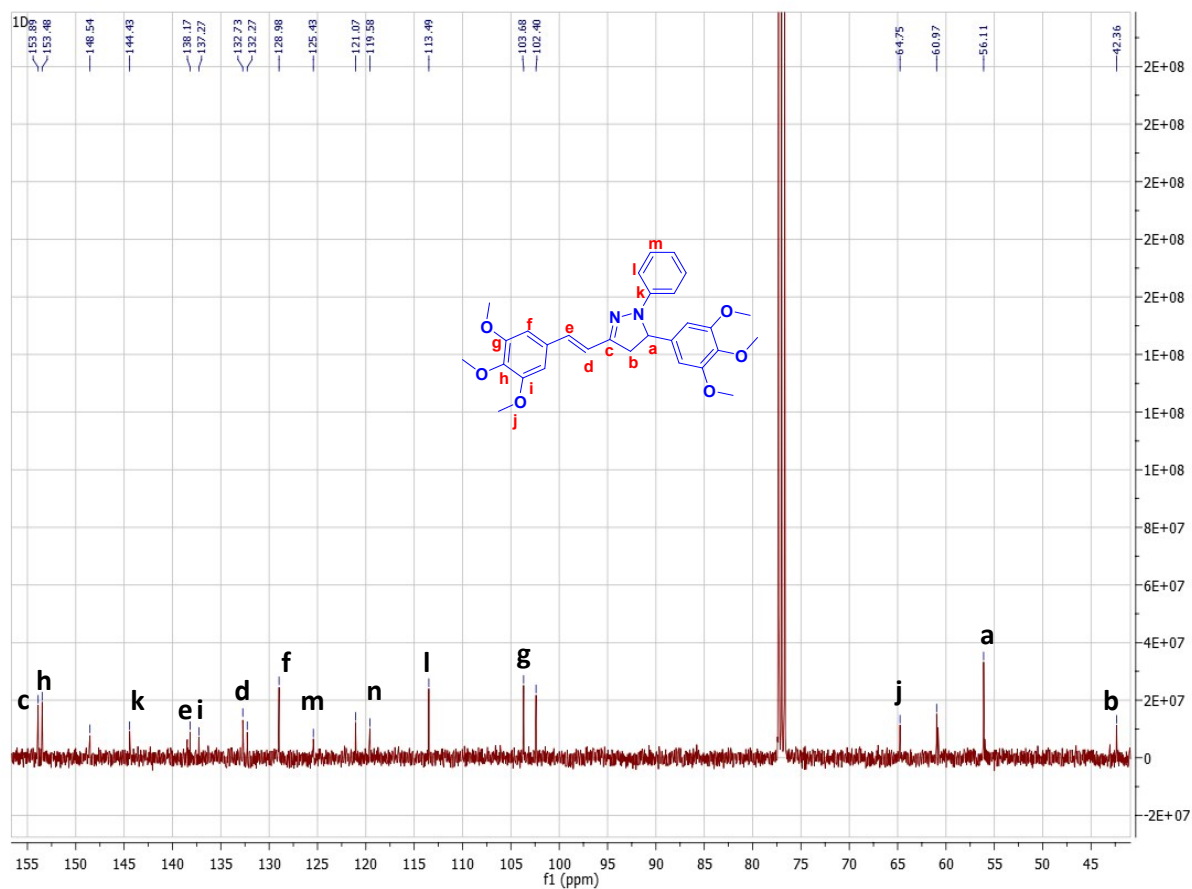

Fig. S10 <sup>13</sup>C-NMR spectrum of **1d** in CDCl<sub>3</sub>.
